# Supplementary material
Source: PubMed Central journal article supplement (PMC9912675)
Supplement: 12913_2023_9144_MOESM1_ESM.pdf [file 12913_2023_9144_MOESM1_ESM.pdf]

Appendix A: Clinical Stability and Social Stability Screening Tool

Clinical Stability Screen

| Must be NO:                                                                                                                                                                                                                                                                                                                                                                                                                                                                                                                                                                                                                                                                                                                                                                                                                                                                                                                                                                                                                               | Yes | No | Comment |
|-------------------------------------------------------------------------------------------------------------------------------------------------------------------------------------------------------------------------------------------------------------------------------------------------------------------------------------------------------------------------------------------------------------------------------------------------------------------------------------------------------------------------------------------------------------------------------------------------------------------------------------------------------------------------------------------------------------------------------------------------------------------------------------------------------------------------------------------------------------------------------------------------------------------------------------------------------------------------------------------------------------------------------------------|-----|----|---------|
| <p>Low diagnostic certainty requiring advanced diagnostics that cannot be performed in the home</p> <p>If yes, select reason (if "other", select and describe):</p> <ul style="list-style-type: none"> <li><input type="checkbox"/> Active live telemetry monitoring</li> <li><input type="checkbox"/> Advanced imaging required (CT, MRI, nuclear stress)</li> <li><input type="checkbox"/> Cardiac catheterization required</li> <li><input type="checkbox"/> EGD/Colonoscopy required</li> <li><input type="checkbox"/> Lab monitoring not amenable to home (troponin, &gt;q12 labs)</li> <li><input type="checkbox"/></li> <li>Other _____</li> </ul>                                                                                                                                                                                                                                                                                                                                                                                 |     |    |         |
| <p>Higher acuity medical services may be required making admission to home clinically unsafe</p> <p>If yes, select reason (if "other", select and describe):</p> <ul style="list-style-type: none"> <li><input type="checkbox"/> Intensive care unit required (i.e. vitals checked &gt;q4hr, BG checked &gt;q2hr, active drip titration etc.)</li> <li><input type="checkbox"/> Intubation risk elevated (i.e. history of intubation for respiratory conditions)</li> <li><input type="checkbox"/> New tracheostomy or mechanical ventilation required</li> <li><input type="checkbox"/> Vasopressor risk elevated (i.e. reasonable risk of fluid refractory hypotension)</li> <li><input type="checkbox"/> Unstable arrhythmias</li> <li><input type="checkbox"/> Elevated risk of respiratory compromise increasing risk of needing support with noninvasive positive pressure ventilation or intubation</li> <li><input type="checkbox"/> Home IV access limitations</li> <li><input type="checkbox"/></li> <li>Other _____</li> </ul> |     |    |         |
| <p>Specific services required that cannot be Provided in the Home</p> <p>If yes, select reason (if "other", select and describe):</p> <ul style="list-style-type: none"> <li><input type="checkbox"/> Risk for inability to obtain IV access</li> <li><input type="checkbox"/> Daily involvement of in person specialty consultation</li> <li><input type="checkbox"/> Blood transfusions likely to be needed (i.e. active GI bleed)</li> <li><input type="checkbox"/> Hemodialysis likely to be required (i.e. already on HD or newly anuric/severe ATN)</li> </ul>                                                                                                                                                                                                                                                                                                                                                                                                                                                                      |     |    |         |

|                                                                                                                                                                                                                                                                                                                                                                                                                                                                                                                                                                                                                          |  |  |  |
|--------------------------------------------------------------------------------------------------------------------------------------------------------------------------------------------------------------------------------------------------------------------------------------------------------------------------------------------------------------------------------------------------------------------------------------------------------------------------------------------------------------------------------------------------------------------------------------------------------------------------|--|--|--|
| <input type="checkbox"/> Respiratory isolation/airborne precautions (high TB concern)<br><input type="checkbox"/> Pain such that would require adjustment of opiates or need for IV therapy<br><input type="checkbox"/> Chronic need for 24/7 care that is currently not in place in the home setting<br><input type="checkbox"/><br>Other _____                                                                                                                                                                                                                                                                         |  |  |  |
| <b>Surgical/IR procedure required that cannot be performed in the home</b><br><br><b>If yes, select reason (if "other", select and describe):</b><br><br><input type="checkbox"/> Surgical consultation required or high risk of being required<br><input type="checkbox"/> Intraabdominal abscess requiring drainage (an example)<br><input type="checkbox"/> Percutaneous nephrostomy tube placement (an example)<br><input type="checkbox"/> Thoracentesis for parapneumonic effusion (an example)<br><input type="checkbox"/> Significant surgical wound debridement<br><input type="checkbox"/><br>Other _____<br>— |  |  |  |
| <b>Clinical partnership with patient and family untenable to safely care for patient</b><br><br><b>If yes, select reason (if "other", select and describe):</b><br><br><input type="checkbox"/> Severe altered mental status unable to be managed safely at home with family and home health aide (an example)<br><input type="checkbox"/> Active substance abuse (an example)<br><input type="checkbox"/> History of or high risk of noncompliance with primary treatment plan<br><input type="checkbox"/><br>Other _____<br>—                                                                                          |  |  |  |
| <b>Is the patient currently on hospice or have a life expectancy of &lt;= 6 mo.?</b>                                                                                                                                                                                                                                                                                                                                                                                                                                                                                                                                     |  |  |  |

## Social Stability Screening Tool

Patient Name: \_\_\_\_\_ Patient DOB: \_\_\_\_\_ Program: \_\_\_\_\_ Date of Screen: \_\_\_\_\_

### Complete for ALL Programs

| Must be YES:                                                                                                                                              | Yes | No | N/A | Comment |
|-----------------------------------------------------------------------------------------------------------------------------------------------------------|-----|----|-----|---------|
| Does the patient have a home recovery environment?                                                                                                        |     |    |     |         |
| Is the patient's home recovery environment in an eligible geography?                                                                                      |     |    |     |         |
| Does the patient's home have water, electricity, bathroom, heat/ac, refrigerator?                                                                         |     |    |     |         |
| Does the patient feel safe at home?                                                                                                                       |     |    |     |         |
| Are family/caregivers willing to participate, as needed, while the patient participates in the MH program?                                                |     |    |     |         |
| Is there a person in the home (patient or other) willing/able to take vital signs and answer phone calls?                                                 |     |    |     |         |
| Is the patient willing to put pets in a secure area while MH affiliated staff are in the home?                                                            |     |    |     |         |
| Is patient willing/able to participate in the MH program (this includes MH affiliated staff entering the home, and MH home equipment set-up in the home)? |     |    |     |         |
| Is the patient/patient's HCP willing/able to sign consent?                                                                                                |     |    |     |         |

| Informative Questions:                                                                                            | Yes | No | N/A | Comment |
|-------------------------------------------------------------------------------------------------------------------|-----|----|-----|---------|
| Does the patient have internet at home and a cell phone?                                                          |     |    |     |         |
| Does the patient live in a stand-alone house or in a community setting? <i>Options: house, apartment, other</i>   |     |    |     |         |
| What floor does the patient live on?                                                                              |     |    |     |         |
| How many steps are there to enter the home?                                                                       |     |    |     |         |
| Is there an elevator at the home?                                                                                 |     |    |     |         |
| Are there stairs within the home? <i>If yes-how many?</i>                                                         |     |    |     |         |
| Does the patient live alone?                                                                                      |     |    |     |         |
| Is there anyone who assists the patient with day to day life? <i>If yes-describe</i>                              |     |    |     |         |
| Does the patient currently have any home services?                                                                |     |    |     |         |
| Is the patient likely to require >4 hrs. of HHA support to fill ADL needs?                                        |     |    |     |         |
| Does the patient have mild, or greater, cognitive impairment?                                                     |     |    |     |         |
| Has the patient experienced a fall within the last 6 mo.? <i>If yes, explain:</i>                                 |     |    |     |         |
| Is the patient homebound?                                                                                         |     |    |     |         |
| Is the NIDA Quick Screen positive for the patient? <i>(see below for NIDA Quick Screen; if positive- explain)</i> |     |    |     |         |

### Social Stability Screening Tool

Patient Name: \_\_\_\_\_ Patient DOB: \_\_\_\_\_ Program: \_\_\_\_\_ Date of Screen: \_\_\_\_\_

|                                                                                                                                               |  |  |  |  |
|-----------------------------------------------------------------------------------------------------------------------------------------------|--|--|--|--|
| Is the NIDA Quick Screen positive for the anyone living in the patient's home? <i>(see below for NIDA Quick Screen; if positive- explain)</i> |  |  |  |  |
| Is the patient's primary language English? <i>If no, what is the patient's primary language?</i>                                              |  |  |  |  |

| <b>Must be NO:</b>                                                                           | <b>Yes</b> | <b>No</b> | <b>N/A</b> | <b>Comment</b> |
|----------------------------------------------------------------------------------------------|------------|-----------|------------|----------------|
| Are there any behavioral diagnosis that would limit patient participation in the MH program? |            |           |            |                |
| Does the patient require 1:1 aid with feeding or daily speech therapy?                       |            |           |            |                |
| Does the patient require 1:1 aid with toileting and lack home assistance?                    |            |           |            |                |
| Is the patient or caregiver unable to call for help or push the emergency help device?       |            |           |            |                |
| Is there active smoking in the home and need for home Oxygen?                                |            |           |            |                |
| Are there unsecured firearms in the home?                                                    |            |           |            |                |
| Does the patient exhibit any signs of neglect suggestive of an unsafe home?                  |            |           |            |                |
| Is the patient deaf?                                                                         |            |           |            |                |

| <b>NIDA Quick Screen:</b>                                                                  |       |               |         |        |                       |  |         |
|--------------------------------------------------------------------------------------------|-------|---------------|---------|--------|-----------------------|--|---------|
| In the past year, how many times have you used the following....                           |       |               |         |        |                       |  |         |
| Alcohol (for men, 5 or more drinks in a day; for women, 4 or more drinks in a day)         | Never | Once or Twice | Monthly | Weekly | Almost Daily or Daily |  | Comment |
| Tobacco Products                                                                           |       |               |         |        |                       |  |         |
| Prescription Drugs for Nonmedical Reasons                                                  |       |               |         |        |                       |  |         |
| Illegal Drugs (if in a state where marijuana is legal, specifically ask re: marijuana use) |       |               |         |        |                       |  |         |

### Social Stability Screening Tool

Patient Name: \_\_\_\_\_ Patient DOB: \_\_\_\_\_ Program: \_\_\_\_\_ Date of Screen: \_\_\_\_\_

#### Complete for SNF Substitution Program ONLY

| Must be YES:                                                                                                                               | Yes | No | N/A | Comment |
|--------------------------------------------------------------------------------------------------------------------------------------------|-----|----|-----|---------|
| Has the patient been recommended for discharge to SNF?                                                                                     |     |    |     |         |
| Are the patient/caregivers aware that HHA support provided by the MH program is temporary?                                                 |     |    |     |         |
| Does the patient's home have sufficient space/appropriate condition for rehab needs?                                                       |     |    |     |         |
| Are caregivers willing to aid the patient w/ADLs during the patient's time in the MH program and post d/c from the MH program (if needed)? |     |    |     |         |

| Must be NO:                                                                                        | Yes | No | N/A | Comment |
|----------------------------------------------------------------------------------------------------|-----|----|-----|---------|
| Has the patient been previously recommended for long-term care?                                    |     |    |     |         |
| Does the patient live at a SNF/SAR/LTAC?                                                           |     |    |     |         |
| Does the patient no longer prefer to live at home after the hospital/SNF stay?                     |     |    |     |         |
| Has the patient required a 1:1 sitter in the last 48 hours?                                        |     |    |     |         |
| Has PT deemed the patient to be either a maximum assist or two assists in any functional category? |     |    |     |         |

#### Complete for ALL Programs

| Must be YES:                      | Yes | No | N/A | Comment |
|-----------------------------------|-----|----|-----|---------|
| Did the patient pass this screen? |     |    |     |         |
